# Supplementary material for: Theoretical framework for measuring cloud effective supersaturation fluctuations with an advanced optical system
Source: Copernicus journal article supplement (doi:10.5194/acp-25-1163-2025), 2025-01-29
Supplement: Supplementary file 1 [file acp-25-1163-2025-supplement.pdf]

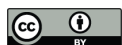

*Supplement of*

## **Theoretical framework for measuring cloud effective supersaturation fluctuations with an advanced optical system**

**Ye Kuang et al.**

*Correspondence to:* Ye Kuang (kuangye@jnu.edu.cn)

The copyright of individual parts of the supplement might differ from the article licence.

## 1 **S1. The reason we choose PM<sub>1</sub> of total aerosol populations as the reference**

2 In clouds, part aerosol activates into cloud droplets, and the rest of them remain as interstitial  
3 aerosols. Therefore, the scatterings of total aerosol populations in dry state  $\sigma_{sp,all}(\lambda)$  can be expressed:

$$4 \quad \sigma_{sp,all}(\lambda) = \sigma_{sp,inter}(\lambda) + \sigma_{sp,act}(\lambda) \quad (S1)$$

5 Where  $\sigma_{sp,inter}(\lambda)$  and  $\sigma_{sp,act}(\lambda)$  represent scatterings of interstitial aerosols and activated aerosols  
6 in dry state, and  $\lambda$  is the optical wavelength.

7 If using 1  $\mu\text{m}$  as the threshold of activated aerosols,  $\sigma_{sp,inter}(\lambda)$  can be expressed as:

$$8 \quad \sigma_{sp,inter}(\lambda) = \sigma_{sp,inter,PM_1}(\lambda) \quad (S2)$$

9 Where  $\sigma_{sp,inter,PM_1}(\lambda)$  represents scatterings of interstitial aerosols that are PM<sub>1</sub> in dry state, and  
10  $\sigma_{sp,inter,PM_{1-2.5}}(\lambda)$  represents scatterings interstitial aerosols that are in the aerodynamic diameter  
11 range of 1-2.5  $\mu\text{m}$ . And the  $\sigma_{sp,act}(\lambda)$  can be expressed as:

$$12 \quad \sigma_{sp,act}(\lambda) = \sigma_{sp,act,PM_1}(\lambda) + \sigma_{sp,act,PM_{1-2.5}}(\lambda) + \sigma_{sp,act,PM_{>2.5}}(\lambda) \quad (S3)$$

13 Where  $\sigma_{sp,act,PM_1}(\lambda)$  represents scatterings of activated aerosols that are PM<sub>1</sub> in dry state,  
14  $\sigma_{sp,act,PM_{1-2.5}}(\lambda)$  represents scatterings of activated aerosols that are in the aerodynamic diameter  
15 range of 1-2.5  $\mu\text{m}$  and  $\sigma_{sp,act,PM_{>2.5}}(\lambda)$  represents scatterings of activated aerosols that are in the  
16 aerodynamic diameter range of  $>2.5$   $\mu\text{m}$ . Therefore,  $\sigma_{sp,all}(\lambda)$  can be expressed as:

$$17 \quad \sigma_{sp,all}(\lambda) = \sigma_{sp,inter,PM_1}(\lambda) + \sigma_{sp,act,PM_1}(\lambda) + \sigma_{sp,act,PM_{1-2.5}}(\lambda) + \sigma_{sp,act,PM_{>2.5}}(\lambda) \quad (S4)$$

18 If a PM<sub>1</sub> impactor were not used after water vapor evaporated for the TSP inlet measurements. Then  
19 the ratio  $f_{sp} = \sigma_{sp,inter}(\lambda)/\sigma_{sp,all}(\lambda)$  lower than 1 could corresponding to two scenarios: (1) part of  
20 submicron aerosols have activated with  $\sigma_{sp,act,PM_{>1}}(\lambda)$  are negligible; (2) no aerosols are activated  
21 with  $\sigma_{sp,act,PM_{>1}}(\lambda)$  are not negligible. That means, we could observe  $f_{sp}$  lower than 1 under both  
22 subsaturated conditions and supersaturated conditions, and this would obscure the  $D_a$  retrievals in  
23 cloud conditions, especially at lower supersaturations, when  $D_a$  is higher and  $\sigma_{sp,inter}(\lambda)$  itself is  
24 relatively small. However, if a PM1 impactor is placed downstream of the inlet and upstream of the  
25 two nephelometers (or other optical instruments), the observed  $f_{sp}$  can be expressed:

$$26 \quad f_{sp} = \sigma_{sp,inter,PM_1}(\lambda)/(\sigma_{sp,inter,PM_1}(\lambda) + \sigma_{sp,act,PM_1}(\lambda)) \quad (S5)$$

27  $f_{sp}$  be lower than 1 could only be caused by activation of submicron aerosols, therefore, facilitate the  
28 accurate retrieval of  $D_a$ .

29 If using 2.5  $\mu\text{m}$  as the threshold of activated aerosols,  $\sigma_{sp,inter}(\lambda)$  can be expressed as:

$$30 \quad \sigma_{sp,inter}(\lambda) = \sigma_{sp,inter,PM_1}(\lambda) + \sigma_{sp,inter,PM_{1-2.5}}(\lambda) \quad (S6)$$

31 the  $\sigma_{sp,act}(\lambda)$  can be expressed as:

$$32 \quad \sigma_{sp,act}(\lambda) = \sigma_{sp,act,PM_1}(\lambda) + \sigma_{sp,act,PM_{1-2.5}}(\lambda) + \sigma_{sp,act,PM_{>2.5}}(\lambda) \quad (S7)$$

33 A  $PM_{2.5}$  impactor downstream of TSP inlet after water evaporates would eliminate the influences of  
34  $\sigma_{sp,act,PM_{>2.5}}(\lambda)$ . However, as demonstrated in Kuang et al. (2018), the  $\sigma_{sp,all}(\lambda)$  are not sensitive to  
35 changes in super-micron aerosols therefore it would be better if only submicron aerosols are included  
36 in observing the scattering fractions of interstitial aerosols and benefits for accurate retrieval of  $D_a$ .  
37 Therefore, no matter using 1 or 2.5  $\mu\text{m}$  as the threshold, the  $PM_1$  impactor are suggested downstream  
38 of the inlet system after heating.

39 As mentioned, In the concept design of Sect.4 of the manuscript, the interior  $PM_1$  impactor was  
40 placed downstream of the inlet system where RH of sample air was heated down to 70%. RH down to  
41 70% is to make sure selected aerosols using the  $PM_1$  impactor are very close to aerosols populations  
42 of  $PM_1$  in dry state based on the investigates of impacts of aerosol hygroscopic growth on cut-off size  
43 shift of impactors (Xu et al., 2024).

44

45

46

47

48

49

50

51

52

53

54

55

56

57 S2. Other Supplementary Figures

58

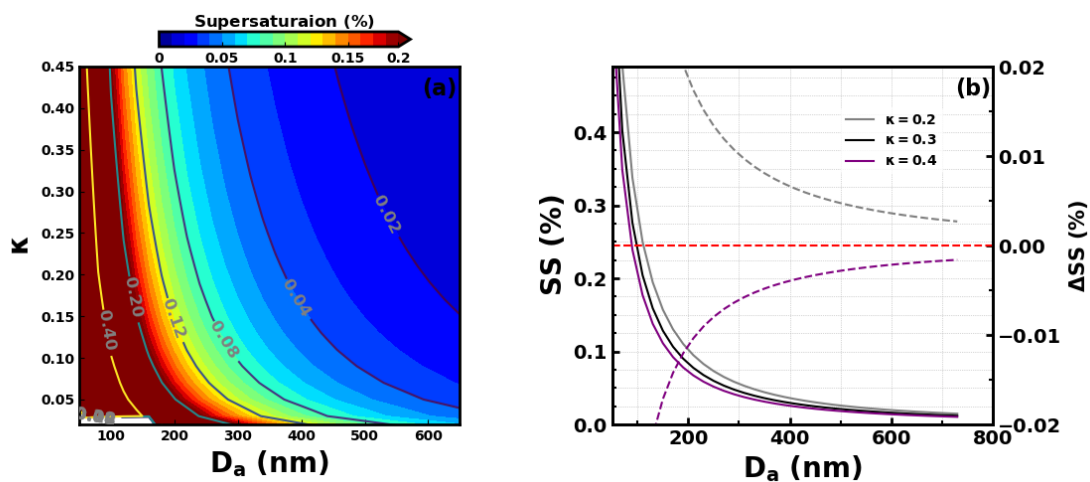

59 **Figure S1.** (a) Supersaturation (SS) variations under different  $D_a$  and  $\kappa$  scenarios; (b) The variations  
60 SS as a function of  $D_a$  for constant  $\kappa$  values of 0.2,0.3,0.4, and the SS differences of  $\kappa=0.2$  and  
61  $\kappa=0.4$  with  $\kappa=0.3$  in the right axis.

62

63

64

65

66

67

68

69

70

71

72

73

74

75

76

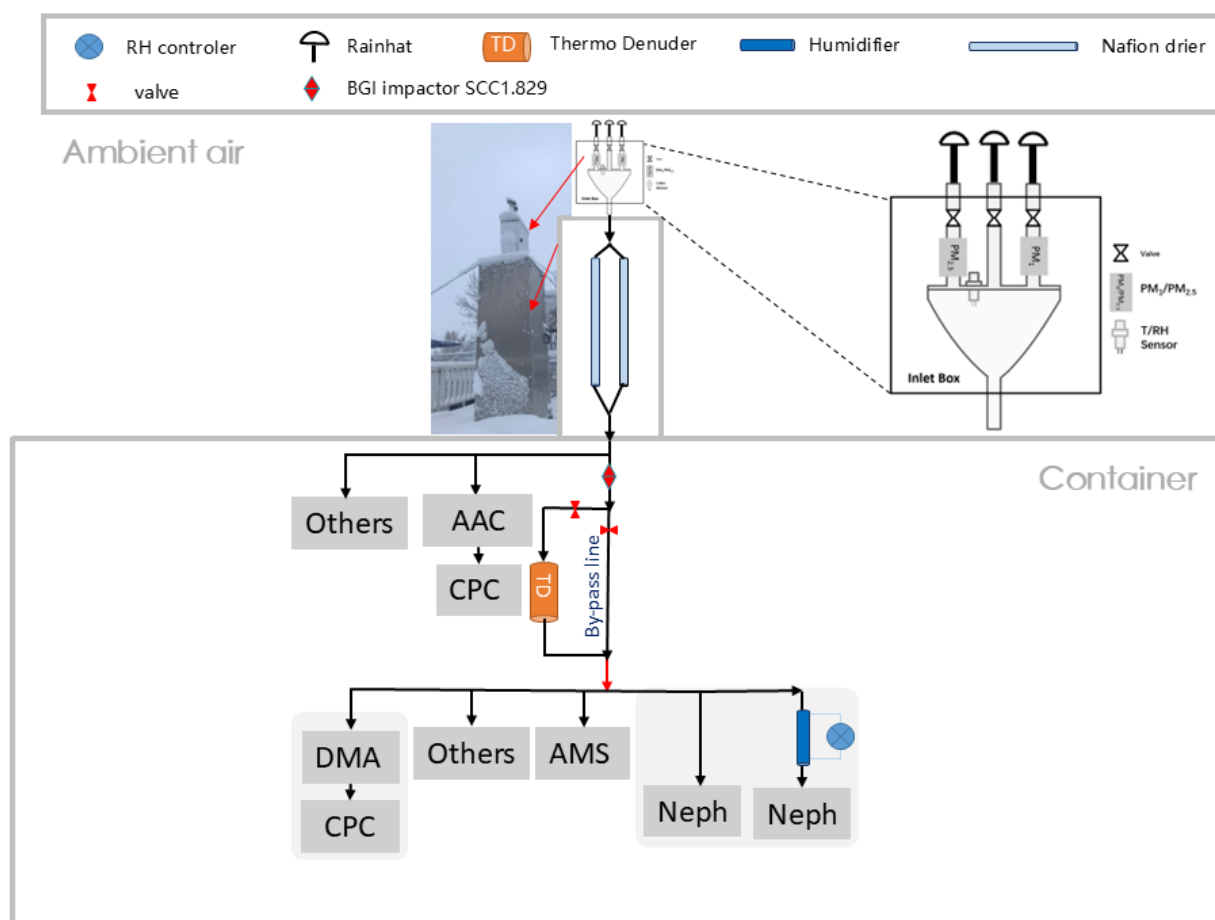

78 **Figure S2.** Schematic of instrument setup during the AQ-SOFAR campaign, with aerosol size  
 79 distributions are measured using Aerodynamic Aerosol Classifier (AAC) and Differential Mobility  
 80 Analyzer (DMA) coupled with Condensation Particle Counters (CPC, TSI 3076 and 3075), and Neph  
 81 represents nephelometer.

82

83

84

85

## 86 **References:**

- 87 Kuang, Y., Zhao, C. S., Zhao, G., Tao, J. C., Xu, W., Ma, N., and Bian, Y. X.: A novel method for  
 88 calculating ambient aerosol liquid water content based on measurements of a humidified nephelometer  
 89 system, *Atmospheric Measurement Techniques*, 11, 2967-2982, 10.5194/amt-11-2967-2018, 2018.  
 90 Xu, W., Kuang, Y., Xu, W., Zhang, Z., Luo, B., Zhang, X., Tao, J., Qiao, H., Liu, L., and Sun, Y.:  
 91 Hygroscopic Growth and Activation Changed Submicron Aerosol Composition and Properties in  
 92 North China Plain, *EGUsphere*, 2024, 1-20, 10.5194/egusphere-2024-998, 2024.

93
